# Supplementary material for: Guiding dose adjustment of amlodipine after co-administration with ritonavir containing regimens using a physiologically-based pharmacokinetic/pharmacodynamic model
Source: PubMed Central journal article supplement (PMC5953987; doi:10.1007/s10928-018-9574-0), 2018-02-09
Supplement: 10928_2018_9574_MOESM1_ESM.pdf [file 10928_2018_9574_MOESM1_ESM.pdf]

# Supplementary Information

Journal of Pharmacokinetics and Pharmacodynamics

## Guiding Dose Adjustment of Amlodipine after Co-administration with Ritonavir Containing Regimens Using a Physiologically-Based Pharmacokinetic/Pharmacodynamic Model

Dwaipayan Mukherjee<sup>1</sup>, JiuHong Zha<sup>1</sup>, Rajeev M. Menon<sup>1</sup>, Mohamad Shebley<sup>1</sup>

<sup>1</sup>Clinical Pharmacology and Pharmacometrics, AbbVie Inc., North Chicago, IL, United States

**Correspondence:** Mohamad Shebley, PhD, AbbVie Inc., Clinical Pharmacology and Pharmacometrics, 1 North Waukegan Road, Dept. R4PK, Bldg. AP31-3, North Chicago, IL 60064, Telephone:+1 (847) 938-3662, Email: Mohamad.shebley@abbvie.com

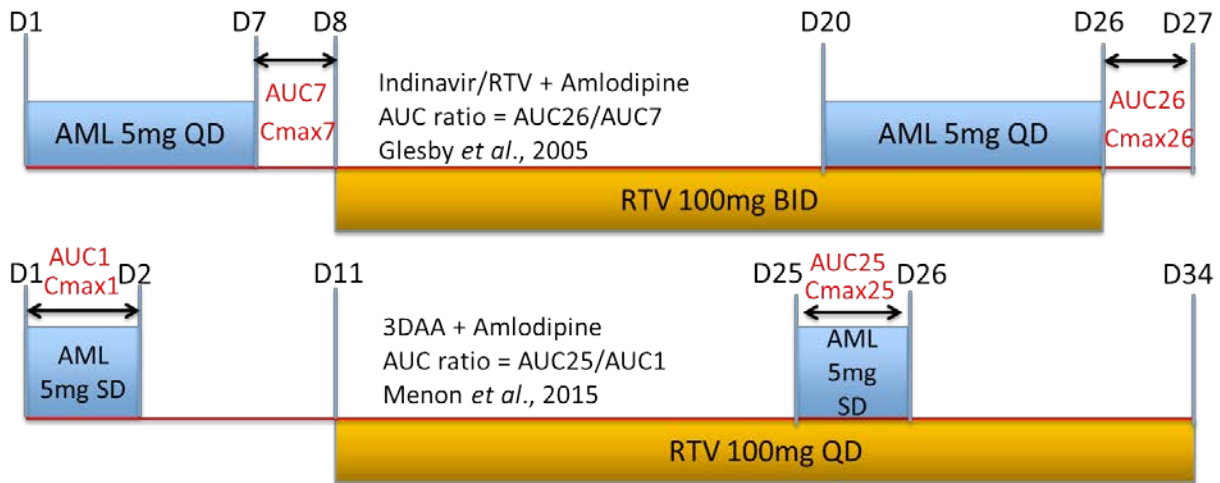

**Figure S1: Clinical study designs of published clinical drug-drug interaction (DDI) studies of amlodipine with ritonavir (RTV)-containing regimens (3DAA refers to the combination regimen of ombitasvir/paritaprevir/RTV + dasabuvir).**

AML, amlodipine; AUC, area under the plasma concentration-time curve; BID, twice daily; C<sub>max</sub>, maximum plasma concentration; D, day; QD, once daily; SD, single dose; AUC1: AUC on day 1 and similarly for others; Cmax1:Cmax on day 1 and similarly for others

```

function indirectAlgebraicStep(t, xin, ...)
  -- Effect of amlodipine on systolic blood pressure
  local Po = 148.84 -- Baseline SBP (mmHg)
  local A = 8.245 -- Pressure amplitude (mmHg)
  local om = 0.463 -- cyclic frequency (1/hr)
  local m = -1285.93 -- Pressure slope (mmHg/mu-M)
  local keo = 0.049 -- Decay from effect compartment (1/hr)
  local t1 = 24 * math.floor(t/24) -- Time scaling to get clock time
  xout = Po + A * math.cos(om * (t - t1)) + m * xin * (1 - math.exp(-keo * t))
  return xout
end

```

**Figure S2:** *Lua* script used to define the pharmacodynamic (PD) model for systolic blood pressure within Simcyp V15R1; Parameter definitions are described in the code in green. The equation for  $xout$  follows the PD model equation as described in Equation 3 in the main text.

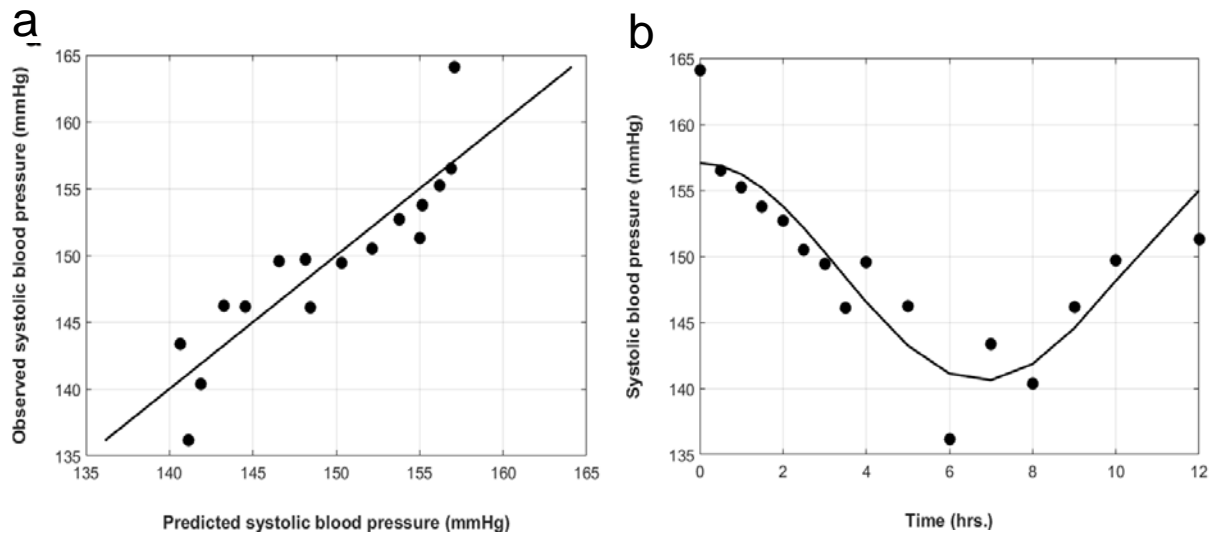

**Figure S3:** Diagnostic plots for the placebo model fit: (a) Goodness of fit plot of observed versus predicted systolic blood pressure (black solid line represents the line of unity); (b) visual predictive check plot for the placebo model (black solid line represents model prediction while black dots represent observed data); Observed data from Donnelly *et al.*, 1993

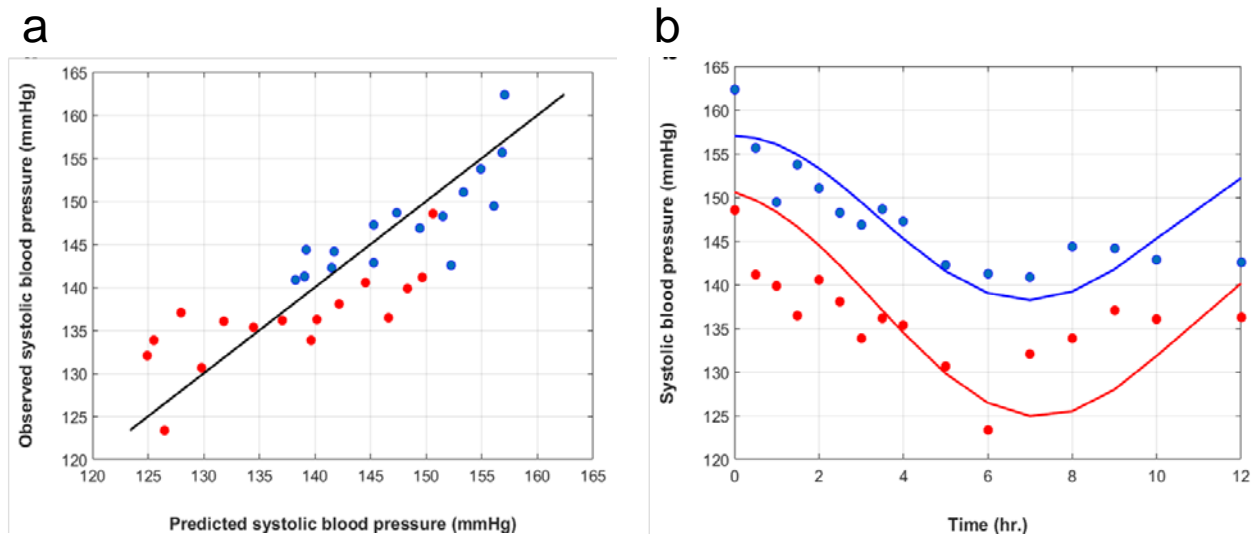

**Figure S4: Diagnostic plots for the complete pharmacodynamic (PD) model fit: (a) Goodness of fit plot of observed versus predicted systolic blood pressure (black solid line represents the line of unity while red and blue dots represent points for day 1 and day 43 respectively); (b) visual predictive check plot for the complete PD model (red and blue colors represent day 1 and day 43, respectively, while solid lines represent model prediction and dots represent observed data); Observed data from Donnelly *et al.*, 1993**

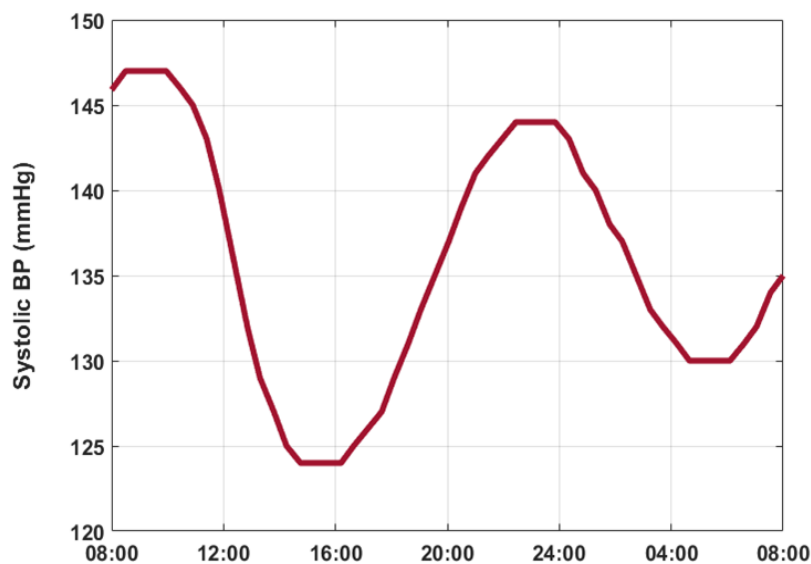

**Figure S5: Model predicted systolic blood pressure over a 24-hour span for a virtual subject on amlodipine 5 mg daily dose at steady-state (after 6 weeks)**

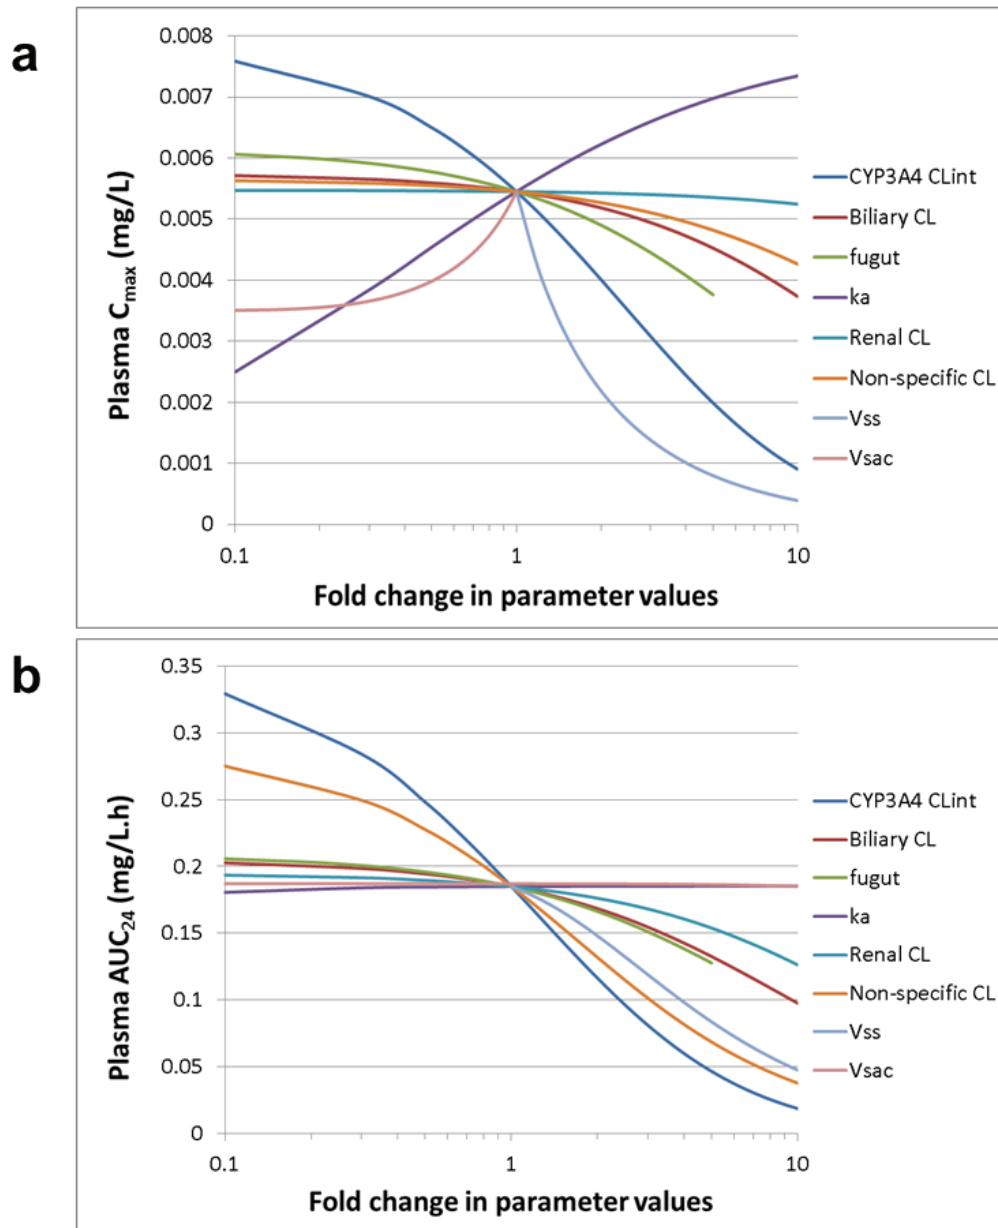

**Figure S6: Results of local sensitivity analysis for 8 parameters in the PBPK model with (a)  $C_{max}$  and (b) 24-hour AUC as output variables; Parameter values were changed from their final values in the model by 10 fold in either direction (nominal value represented by 1). y-axis represents (a) maximum plasma concentration ( $C_{max}$ ) and (b) area under the plasma concentration curve integrated over 24 hours.**

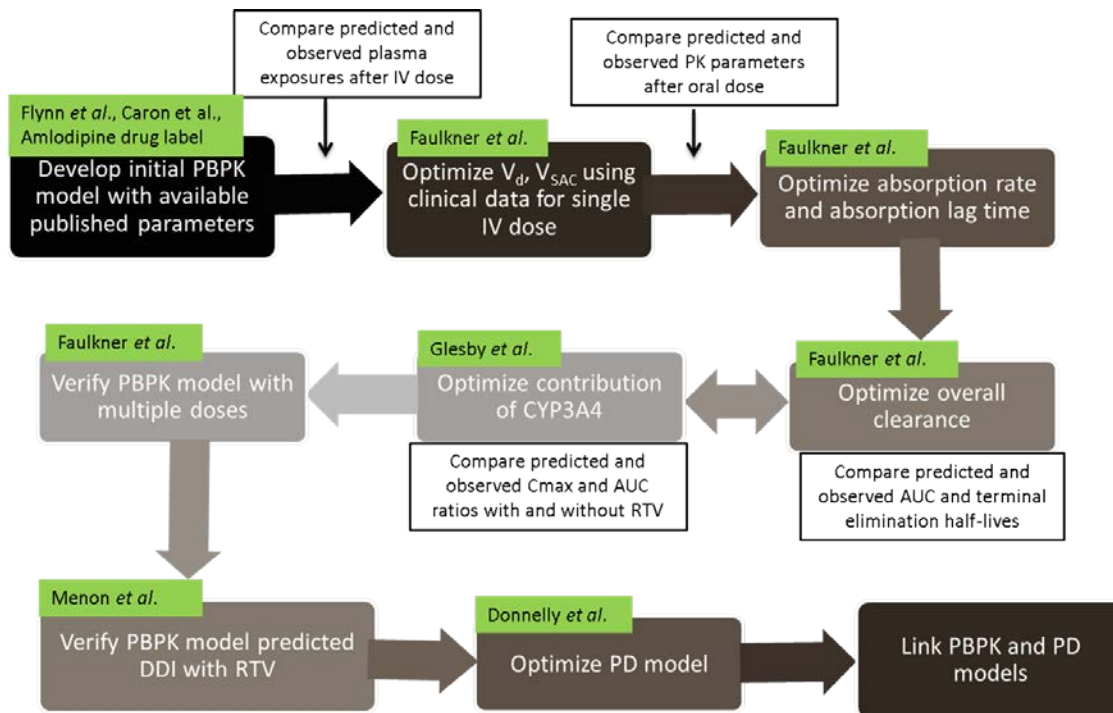

**Figure S7: Flow diagram describing the model development and decision processes along with the data sources used in each step.**

| <b>Assumption</b>                                                   | <b>Justification</b>                                                                                                                                                                                                                  | <b>Implication</b>                                                                                                                                                             |
|---------------------------------------------------------------------|---------------------------------------------------------------------------------------------------------------------------------------------------------------------------------------------------------------------------------------|--------------------------------------------------------------------------------------------------------------------------------------------------------------------------------|
| 1st order absorption model                                          | <ul style="list-style-type: none"> <li>• Model parsimony</li> <li>• BCS class I compound with high rate of absorption</li> <li>• Main motive of model is to predict DDI and not changes in pharmaceuticals characteristics</li> </ul> | Changes in the oral absorption model does not affect the overall DDI results with RTV                                                                                          |
| Fraction absorbed = 1                                               | Human mass balance study found same amlodipine recovery in feces after oral and IV administration (Stopher <i>et al.</i> , 1988)                                                                                                      | Change in fraction absorbed would affect the initial part of the plasma concentrations                                                                                         |
| Minimal PBPK model for distribution                                 | Amlodipine distribution into other tissues is not an important consideration and plasma exposure is sufficient for prediction of efficacy; no known tissue uptake transporters involved                                               | Amlodipine concentration in tissues other than the liver, gut, and blood cannot be predicted by the model                                                                      |
| Biliary clearance                                                   | Amlodipine shown to undergo entero-hepatic recirculation (Rausl <i>et al.</i> , 2006; Stopher <i>et al.</i> , 1988)                                                                                                                   | No significant effect                                                                                                                                                          |
| Minor renal elimination                                             | Renal elimination only 6% (Beresford <i>et al.</i> , 1988) Renally impaired patients had no change in plasma exposure compared with healthy subjects (Laher <i>et al.</i> , 1988)                                                     | No significant effect                                                                                                                                                          |
| Additional non-specific systemic clearance                          | No other enzymes or transporters have been indicated to be contributing to amlodipine clearance                                                                                                                                       | This ensures agreement of the overall predicted clearance with observed clearance while maintaining known pathway contributions such as CYP3A4 compared with the observed data |
| Systolic blood pressure is the appropriate pharmacodynamic variable | SBP has been indicated to be an important predictor of cardiovascular disease. (Canale <i>et al.</i> , 1991). It is also more important to control SBP than diastolic blood pressure. (Byyny <i>et al.</i> , 1997)                    | This ensures that clinical dose adjustments are related to the key clinical endpoint and outcome                                                                               |

**Table S1: List of assumptions made during PBPK/PD model development**

| <b>Study</b>             | <b>Population</b>    | <b>Age (year)</b> | <b>n</b> | <b>Amlodipine Dose</b> |
|--------------------------|----------------------|-------------------|----------|------------------------|
| Faulkner et al., 1986    | Healthy              | 25.8 ± 3.8        | 12       | 10 mg                  |
| Williams & Cubeddu, 1988 | Healthy              | 23 - 34           | 12       | 10 mg                  |
| Sasaki et al., 2001      | Hypertensive         | 78 ± 9            | 8        | 5 mg                   |
| Rausl et al., 2006       | Healthy              | -                 | 24       | 10 mg                  |
| Lv et al., 2014          | Healthy<br>(Chinese) | -                 | 12       | 10 mg                  |
| Elliott et al., 1988     | Healthy              | 72 ± 6.3          | 16       | 5 mg                   |
| Faulkner et al., 1989    | Healthy              | 24.3 ± 3.4        | 12       | 20 mg                  |
| Stopher et al., 1988     | Healthy              | -                 | 2        | 15 mg                  |
| Donnelly et al., 1993    | Hypertensive         | 25 – 64           | 12       | 5 mg                   |

**Table S2: Summary of subject demographics for clinical studies with amlodipine**

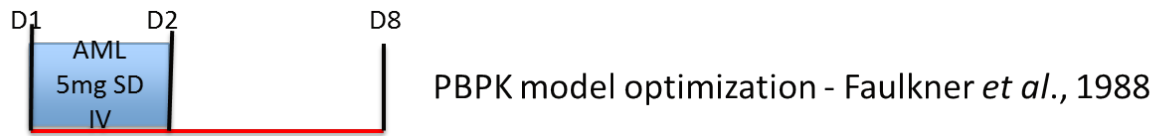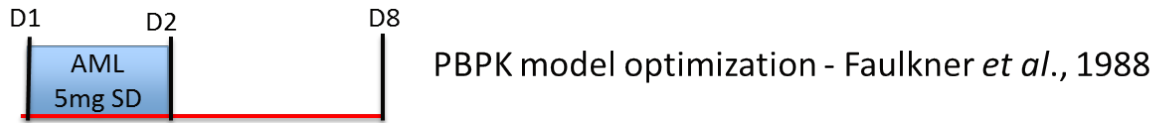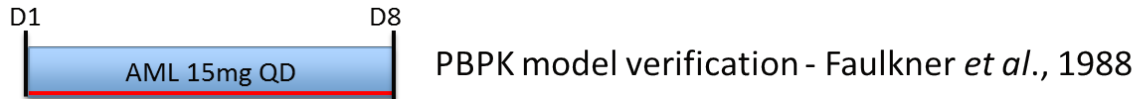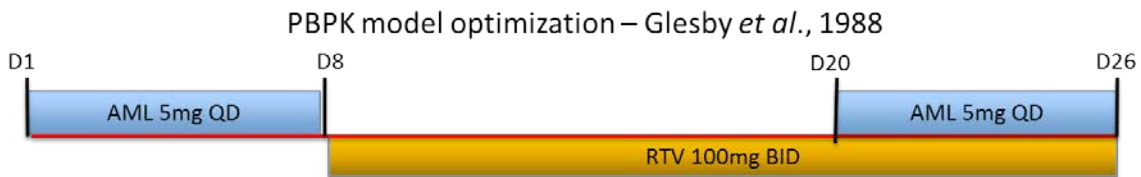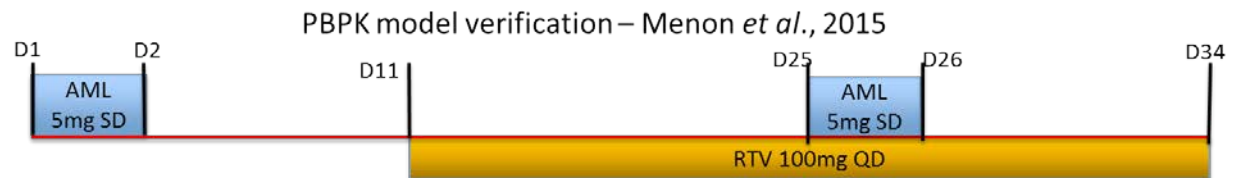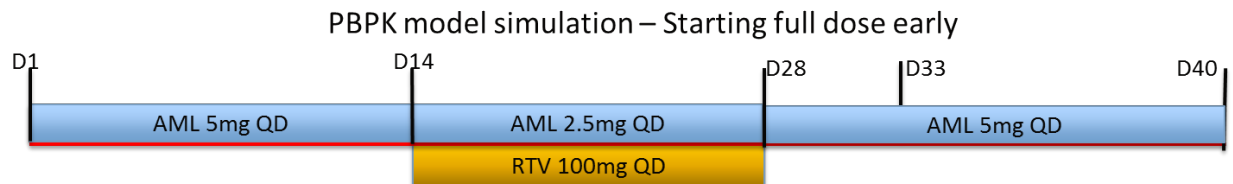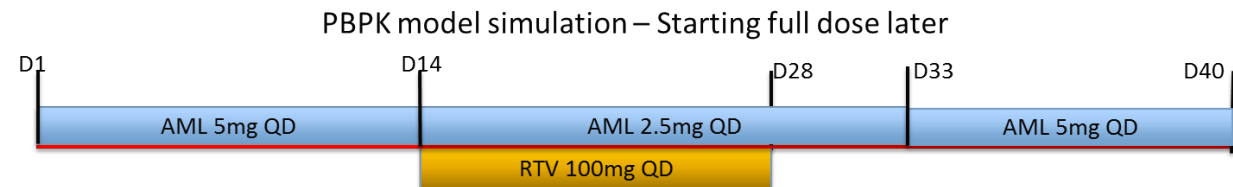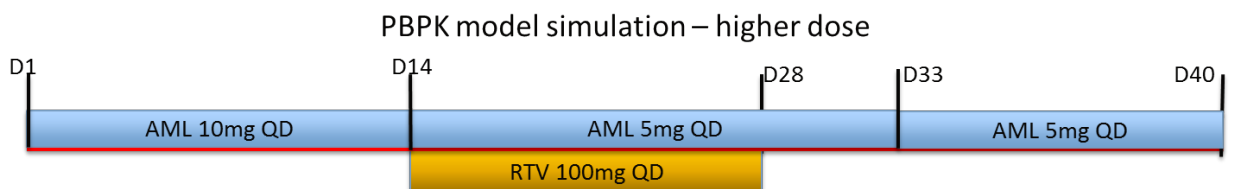

**Figure S8: Simulation trial designs conducted using the final PBPK model in Simcyp**
